1 *Original research article*

2  
3 **Syntrophy between fermentative and purple phototrophic bacteria**  
4 **for carbohydrate-based wastewater treatment**

5  
6 Marta Cerruti<sup>1</sup>, Guillaume Crosset-Perrotin<sup>1</sup>, Mythili Ananth<sup>1</sup>, Jules L. Rombouts<sup>1,2</sup>

7 and David G. Weissbrodt<sup>1,\*</sup>

8  
9 <sup>1</sup> Department of Biotechnology, Delft University of Technology, Delft, The Netherlands

10 <sup>2</sup> Nature's Principles B.V., Den Haag, The Netherlands

11  
12 \* Correspondence: Prof. David Weissbrodt, Weissbrodt Group for Environmental Life Science  
13 Engineering, Environmental Biotechnology Section, Department of Biotechnology, TNW Building  
14 58, van der Maasweg 9, 2629 HZ Delft, The Netherlands, Tel: +31 15 27 81169; E-mail:  
15 [d.g.weissbrodt@tudelft.nl](mailto:d.g.weissbrodt@tudelft.nl)

17 **ABSTRACT**

18 Fermentative chemoorganoheterotrophic bacteria (FCB) and purple photoorganoheterotrophic  
19 bacteria (PPB) are two interesting microbial guilds to process carbohydrate-rich wastewaters. Their  
20 interaction has been studied in axenic pure cultures or co-cultures. Little is known about their  
21 metabolic interactions in open cultures. We aimed to harness the competitive and syntrophic  
22 interactions between PPB and FCB in mixed cultures. We studied the effect of reactor regimes (batch  
23 or continuous, CSTR) and illumination modes (continuous irradiation with infrared light, dark, or  
24 light/dark diel cycles) on glucose conversions and the ecology of the process. In batch, FCB  
25 outcompeted (>80%) PPB, under both dark and infrared light conditions. In CSTR, three FCB  
26 populations of *Enterobacteriaceae*, *Lachnospiraceae* and *Clostridiaceae* were enriched (>70%),  
27 while *Rhodobacteraceae* relatives of PPB made 30% of the community. Fermentation products  
28 generated from glucose were linked to the dominant FCB. Continuous culturing at a dilution rate of  
29  $0.04\text{ h}^{-1}$  helped maintain FCB and PPB in syntrophy: FCB first fermented glucose into volatile fatty  
30 acids and alcohols, and PPB grew on fermentation products. Direct supply of carboxylates like acetate  
31 under infrared light enriched for PPB (60%) independent of reactor regimes. Ecological engineering  
32 of FCB- and PPB-based biorefineries can help treat and valorize carbohydrate-based waste  
33 feedstocks.

34

35 **Keywords:** photoorganoheterotrophs; chemoorganoheterotrophs; syntrophy; mixed-culture  
36 fermentation; resource recovery

37

38 **GRAPHICAL ABSTRACT**

39

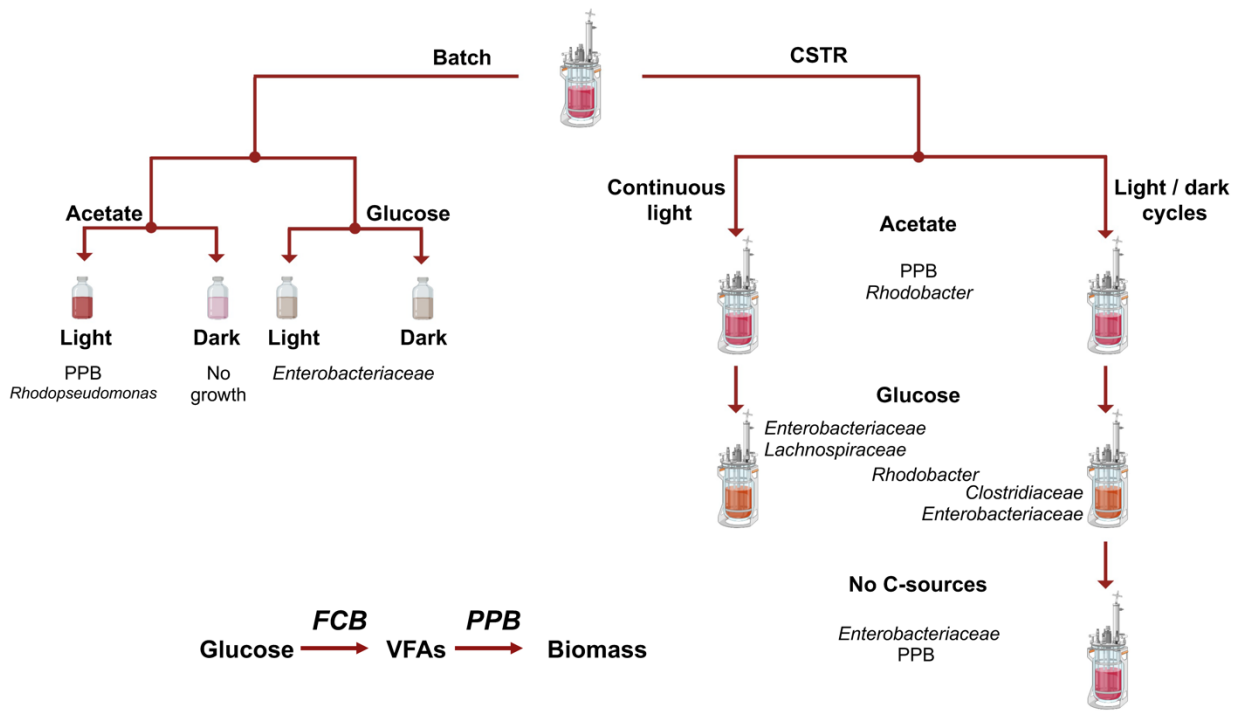

40

41

## 42 INTRODUCTION

43 In the natural environment, bacteria evolved to occupy diverse niches (Steindler et al., 2020).  
44 Microorganisms form metabolic associations to grow under nutrient-limiting conditions (Pearman et  
45 al., 2008). Anthropogenic environments like biological wastewater treatment plants (WWTPs)  
46 involve relatively high concentrations of organics (up to 200 g COD L<sup>-1</sup>) and other nitrogenous and  
47 phosphorous nutrients, and complex compositions of carbon sources like cellulose and undigested  
48 fibers from food. In agri-food industrial wastewaters, most of organics are derived from simple  
49 carbohydrates (*e.g.*, glucose, fructose or xylose) and polymeric sugars such as starch, cellulose and  
50 lignocellulosic derivatives (Ghosh et al., 2017).

51 The wastewater treatment sector transitions to develop bioprocesses that combine nutrient removal  
52 with bioproduct valorization. Environmental biotechnologies are studied to treat and valorize  
53 nutrient-rich wastewaters by unravelling the biochemical mechanisms that can drive product  
54 formation (Kleerebezem & van Loosdrecht, 2007). The efficiency of mixed-culture processes is based  
55 on proper selection of microbial guilds needed to metabolize the wastes. Two guilds across chemo-  
56 and photoorganoheterotrophic groups are particularly attractive to process carbohydrate- and  
57 carboxylate-based feedstocks.

58 Fermentative chemoorganoheterotrophic bacteria (FCB) degrade carbohydrates through fermentation  
59 pathways, producing a spectrum of valuable compounds such as carboxylates (*e.g.*, volatile fatty acids  
60 – VFAs, lactic acid), ethanol and H<sub>2</sub>. Their microbial niches are harnessed in non-axenic mixed-  
61 culture fermentation processes to valorize, *e.g.*, lignocellulosic sugars into targeted fermentation  
62 products like lactate or ethanol (Rombouts et al., 2020).

63 Purple phototrophic bacteria (PPB) are versatile microorganisms, involving a diversity of  
64 phototrophic and chemotrophic metabolisms depending on environmental and physiological  
65 conditions (**Table 1**). They grow preferentially as photoorganoheterotrophs, harvesting their energy  
66 from infrared (IR) light and using a variety of carbon sources from carboxylates to carbohydrates to

67 alcohols (Imam et al., 2011; Okubo et al., 2005; D. Puyol et al., 2017). PPB can also grow as  
 68 chemotrophs using organic or inorganic substrates (Hunter et al., 2009). As photoheterotrophs, they  
 69 can achieve high biomass yields up to 1 g COD<sub>x</sub> g<sup>-1</sup> COD<sub>s</sub> (Daniel Puyol & Batstone, 2017), that can  
 70 be exploited to valorize anabolic products like biomass, single-cell proteins used in animal/human  
 71 feed, or industrially relevant compounds like carotenoids.

72

73 **Table 1.** Metabolic versatility of purple phototrophic bacteria (PPB). PPB can grow by combining a diversity of substrates  
 74 and redox conditions. PPB grow primarily as photoorganoheterotrophs using VFAs as preferential carbon sources. but  
 75 they are able to grow also on glucose with low growth rates. The metabolisms targeted in this study for the conversion of  
 76 glucose by combination of fermentation and photoorganoheterotrophy are highlighted in grey.

| Metabolism                                          | Energy source<br>(photo-/chemo-)                 | Electron donors<br>(organo-/litho-)                                                                                             | Oxidized e-donors                                                                                                                             | Carbon source<br>(hetero-/auto-) | Electron acceptors                                            | Reduced e-acceptors                                                              |
|-----------------------------------------------------|--------------------------------------------------|---------------------------------------------------------------------------------------------------------------------------------|-----------------------------------------------------------------------------------------------------------------------------------------------|----------------------------------|---------------------------------------------------------------|----------------------------------------------------------------------------------|
| <i>Under light conditions</i>                       |                                                  |                                                                                                                                 |                                                                                                                                               |                                  |                                                               |                                                                                  |
| <b>Anoxygenic photoorganoheterotrophy</b>           | Light photons                                    | Reduced organic                                                                                                                 | Oxidized organic, CO <sub>2</sub>                                                                                                             | Organic                          | Endogenous compound, CO <sub>2</sub> fixation                 | Biomass                                                                          |
| <b>Anoxygenic photolithoautotrophy</b>              | Light photons                                    | Reduced inorganic<br>H <sub>2</sub><br>H <sub>2</sub> S<br>Fe <sup>2+</sup><br>NO <sub>2</sub> <sup>-</sup><br>H <sub>2</sub> O | Oxidized inorganic<br>H <sub>2</sub> O<br>SO <sub>4</sub> <sup>2-</sup><br>Fe <sup>3+</sup><br>NO <sub>3</sub> <sup>-</sup><br>O <sub>2</sub> | Inorganic (CO <sub>2</sub> )     | Endogenous compound, CO <sub>2</sub> fixation                 | Biomass                                                                          |
| <b>Oxygenic photolithoautotrophy</b>                | Light photons                                    | H <sub>2</sub> O                                                                                                                | O <sub>2</sub>                                                                                                                                | Inorganic (CO <sub>2</sub> )     | Endogenous compound, CO <sub>2</sub> fixation                 | Biomass                                                                          |
| <b>Photofermentation</b><br>(not growth associated) | Light photons                                    | Excess electrons energized from substrate                                                                                       | -                                                                                                                                             | -                                | H <sup>+</sup>                                                | H <sub>2</sub>                                                                   |
| <i>Under dark conditions</i>                        |                                                  |                                                                                                                                 |                                                                                                                                               |                                  |                                                               |                                                                                  |
| <b>Aerobic-respiring chemoorganoheterotrophy</b>    | Chemical redox reaction by aerobic respiration   | Reduced organic                                                                                                                 | CO <sub>2</sub>                                                                                                                               | Organic                          | O <sub>2</sub>                                                | H <sub>2</sub> O<br>Biomass                                                      |
| <b>Anaerobic-respiring chemoorganoheterotrophy</b>  | Chemical redox reaction by anaerobic respiration | Reduced organic                                                                                                                 | CO <sub>2</sub>                                                                                                                               | Organic                          | NO <sub>3</sub> <sup>-</sup><br>SO <sub>4</sub> <sup>2-</sup> | N <sub>2</sub><br>S <sup>0</sup> , HS <sup>-</sup> , H <sub>2</sub> S<br>Biomass |
| <b>Fermentative chemoorganoheterotrophy</b>         | Chemical redox reaction by fermentation          | Reduced organic (e.g., fermentable sugars)                                                                                      | Pyruvate or CO <sub>2</sub>                                                                                                                   | Organic                          | Endogenous compound                                           | Fermentation products (e.g., acetate, H <sub>2</sub> ),<br>Biomass               |

77

78 Further studies evaluated PPB ability to do photofermentation, coupling glucose degradation to H<sub>2</sub>  
79 production. Combinations of fermentative chemoorganoheterotrophy, photoorganoheterotrophy and  
80 photofermentation processes have been tested for carbohydrate degradation and conversion. In (i)  
81 *two-stage dark fermentation and photoorganoheterotrophy*, the process is carried in two separate  
82 reactors. In the first unit, pure cultures of FCB degrade carbohydrates into VFAs that are then fed in  
83 the second unit to produce PPB biomass in pure cultures (Ghimire et al., 2015). In (ii) *single-stage*  
84 *fermentation*, glucose is degraded by pure-cultures of PPB, with longer contact times compared to  
85 the two-stages fermentation and the requirement of a pre-sterilized feed stream and axenic  
86 environment (Abo-Hashesh & Hallenbeck, 2012). In (iii) *single-stage dark and photofermentation*,  
87 attempts have been made to co-cultivate defined species of FCB and PPB to simultaneously degrade  
88 carbohydrates and convert the produced VFAs to biomass (Rai & Singh, 2016). Despite the  
89 advantages of this technique, including lower investment and operation costs compared to the two-  
90 staged fermentation, it still requires an axenic environment.

91 In this context of associating fermentation and photoorganoheterotrophy, one can also wonder  
92 whether PPB, due to their metabolic versatility, could be selected in the mixed culture to perform  
93 both dark fermentation and photoorganoheterotrophy, or whether FCB would be more efficient on  
94 fermentation, prior to supplying fermentation products for the PPB to grow.

95 Open mixed cultures have the advantage, compared to traditional industrial biotechnology  
96 approaches, to not require sterilization of the inflow, therefore substantially reducing the costs  
97 (Kleerebezem & van Loosdrecht, 2007). Based on ecological selection principles, microorganisms  
98 can be selected to specifically target substrate degradation, bioproduct valorization or both.

99 Many studies have focused on H<sub>2</sub> production with FCB and PPB pure cultures or with co-cultures in  
100 axenic conditions. Little is known about the community dynamics in open mixed cultures. The  
101 interactions between populations and their metabolic interdependency have not been unraveled.

102 Here, we evaluated the ecological association of PPB and FCB in carbohydrate-fed mixed cultures.  
103 We addressed the selection mechanisms, competitive and syntrophic interactions of the two microbial  
104 guilds across reactor (batch, chemostat) and IR light irradiance (light, dark, dark/light) regimes using  
105 either glucose or acetate as model carbohydrate and carboxylate substrates that harbor the same  
106 degree of reduction ( $4 \text{ mol e}^- \text{ C-mol}^{-1}$ ). With this microbial ecology insights, we tested the possibility  
107 to treat carbohydrate-rich wastewaters in a single-stage mixed-culture process assembling FCB and  
108 PPB in syntrophy.

109

## 110 **MATERIAL AND METHODS**

### 111 **Mixed-culture bioreactor systems**

112 To evaluate microbial competition between PPB and fermenters, two mixed-culture bioreactor  
113 regimes (batch and continuous culturing), two substrates with the same degree of reduction per carbon  
114 mole (acetate and glucose), and three light patterns (continuous illumination, continuous dark, and  
115 light / dark switches with a ratio of 12h / 8h) were applied. The reactor performances were measured  
116 by quantitative biotechnology endpoints (rates, yields). Microbial selection and community dynamics  
117 were tracked by 16S amplicon sequencing. The experimental design is shown in **Table 2**.

118

119 **Table 2.** Combinations of operational conditions tested to address selection, competition, and interaction mechanisms  
120 between FCB and PPB.

| <b>Reactor regime</b> | <b>Organic substrate</b> | <b>Illumination</b> | <b>Input concentration of organic matter (gCOD L<sup>-1</sup>)</b> |
|-----------------------|--------------------------|---------------------|--------------------------------------------------------------------|
| Batch                 | Acetate                  | Continuous          | 10                                                                 |
| Batch                 | Acetate                  | No (dark)           | 10                                                                 |
| Batch                 | Glucose                  | Continuous          | 10                                                                 |
| Batch                 | Glucose                  | No (dark)           | 10                                                                 |
| CSTR                  | Acetate                  | Continuous          | 5 / 10                                                             |
| CSTR                  | Glucose                  | Continuous          | 5                                                                  |
| CSTR                  | Acetate                  | 16h light / 8h dark | 10                                                                 |
| CSTR                  | Glucose                  | 16h light / 8h dark | 10                                                                 |
| CSTR                  | No carbon sources        | 16h light / 8h dark | -                                                                  |

121

## 122 **Compositions of cultivation media**

123 Under all conditions, the cultures were provided with a mineral medium composed of (per L): 0.14 g  
124 KH<sub>2</sub>PO<sub>4</sub>, 0.21 g K<sub>2</sub>HPO<sub>4</sub>, 1 g NH<sub>4</sub>Cl, 2 g MgSO<sub>4</sub>·7H<sub>2</sub>O, 1 g CaCl<sub>2</sub>·2H<sub>2</sub>O, 1 g NaCl, and 2 mL of  
125 trace elements and 2 mL of vitamins solutions. The stock solution of vitamins was composed of 200  
126 mg thiamine–HCl, 500 mg niacin, 300 mg *p*-amino-benzoic acid, 100 mg pyridoxine–HCl, 50 mg  
127 biotin and 50 mg vitamin B12 per liter. The trace elements solution was made of (per L): 1100 mg  
128 Na<sub>2</sub>EDTA·2 H<sub>2</sub>O, 2000 mg FeCl<sub>3</sub>·6 H<sub>2</sub>O, 100 mg ZnCl<sub>2</sub>, 64 mg MnSO<sub>4</sub>·H<sub>2</sub>O, 100 mg H<sub>3</sub>BO<sub>3</sub>, 100  
129 mg CoCl<sub>2</sub>·6 H<sub>2</sub>O, 24 mg Na<sub>2</sub>MoO<sub>4</sub>·2 H<sub>2</sub>O, 16 mg CuSO<sub>4</sub>·5 H<sub>2</sub>O, 10 mg NiCl<sub>2</sub>·6 H<sub>2</sub>O and 5 mg  
130 NaSeO<sub>3</sub>. The cultivation medium was buffered at pH 7.0 with 4 g L<sup>-1</sup> 4-(2-hydroxyethyl)-  
131 1piperazineethanesulfonic acid (HEPES). Sodium acetate and glucose were used as carbon sources,



132 in a concentration of 5 or 10 g COD L<sup>-1</sup> depending on experimental conditions (**Table 2**), mimicking  
133 concentrations of moderately loaded agri-food wastewaters. Acetate was provided as C<sub>2</sub>H<sub>3</sub>O<sub>2</sub>·3H<sub>2</sub>O  
134 (18.28 g L<sup>-1</sup>) and glucose as C<sub>6</sub>H<sub>12</sub>O<sub>6</sub>·H<sub>2</sub>O (9.68 g L<sup>-1</sup>).

135

### 136 **Batches operational conditions**

137 PPB biomass from an in-house enrichment culture grown in a sequencing batch reactor (SBR)  
138 (Cerruti et al., 2020) was used to inoculate 100-ml anaerobic bottles. The cultures were flushed with  
139 99% argon gas to maintain anaerobic conditions (Linde, NL, >99% purity). Every batch bottle was  
140 duplicated. Half of the batch bottles were exposed to dark. The other half were exposed to IR light (>  
141 700 nm) supplied by a halogen lamp (white light) with a power of 120 W whose wavelengths below  
142 700 nm were filtered out by two filter sheets (Black Perspex 962, Plasticstocktist, UK). Every batch  
143 was incubated in a closed shaker (Certomat® BS1, Sartorius Stedim Biotech, Germany) at 30±1 °C under  
144 dark conditions and at 37±1 °C under light conditions: these differences in temperature were due to  
145 an uncontrolled heat derived from the lamps. The flasks were kept under agitation at 170 rpm. The  
146 cultures were fed with 10 g COD L<sup>-1</sup> of either glucose or acetate.

147

### 148 **Continuous culture conditions**

149 A 2.5-L reactor with 2 L of working volume connected to a controller system (In-Control and Power  
150 units, Applikon, Netherlands) was used to tune the syntrophy of FCB and PPB under continuous  
151 conditions. The pH was set at 7.0 and regulated with NaOH at 0.25 mol L<sup>-1</sup> and HCl 1 mol L<sup>-1</sup> and  
152 the temperature was maintained at 30 °C with a heat exchanger.

153 The reactor was irradiated from two opposite sides with 2 incandescent lights filtered for wavelengths  
154  $\lambda > 700$  nm by two sheets (Black Perspex 962, Plasticstocktist, UK) to promote PPB growth. The  
155 light intensity on the reactor wall was 270 W m<sup>-2</sup> and was measured with a pyranometer (CMP3, Kipp  
156 & Zonen, The Netherlands).

157 After start-up under batch mode and PPB enrichment with acetate, the dilution rate was set at  $0.04 \text{ h}^{-1}$   
158 <sup>1</sup>, equal to less than half of the  $\mu_{\text{max}}$  of the PPB representative genus *Rhodopseudomonas* ( $0.1 \text{ h}^{-1}$ )  
159 (Cerruti et al., 2020).

160 Four combinations of energy patterns and carbon sources were tested: (i) continuous light with  
161 acetate, (ii) continuous light with glucose, (iii) light/ dark (16/8 h) cycles with acetate, and (iv) light/  
162 dark (16/8 h) cycles with glucose. Light and dark alternation was controlled with an automatic switch  
163 time controlled (GAMMA, The Netherlands).

164 After 3 months of continuous cultivation, the carbon source feed was stopped, while phosphate and  
165 nitrogen sources were maintained for a period of 4 days (ca 4.5 HRTs), in order to evaluate the  
166 hypothesis that PPB can grow on fermentation products produced by FCB.

167

#### 168 **Mass spectrometry for off-gas analyses**

169 The off-gas of all CSTR was connected to a mass spectrometer (ThermoFisher, Prima BT Benchtop  
170 MS) which was used to measure the production rates of  $\text{CO}_2$  and  $\text{H}_2$ .

171

#### 172 **Sampling**

173 All samples were collected in 2 ml Eppendorf tubes, centrifuged at  $10000 \times g$  for 3 minutes. The  
174 biomass pellet was separated from the supernatant and stored at  $-20^\circ\text{C}$  until further analysis. The  
175 supernatant was filtered with  $0.2 \mu\text{m}$  filters (Whatman, US), and stored at  $-20^\circ\text{C}$  until further analysis.

176 In the batch cultures, the samples were collected every 24 h. During the CSTR, 5 to 9 samples were  
177 collected for each condition.

178

#### 179 **Biomass determination**

180 Biomass concentrations were measured over the time course of the batch and continuous reactors by  
181 spectrophotometry (Biochrom, Libra S11, US) absorbance at 660 nm ( $A_{660}$ ). A calibration curve was

182 established to correlate  $A_{660}$  to g volatile suspended solids (gVSS) concentration:  $c(\text{gVSS L}^{-1}) = 0.61$   
183  $A_{660}$ . Biomass gVSS was measured taking samples from the liquid phase, filtering them using 0.2  $\mu\text{m}$   
184 filters (Whatman, 435 USA) and drying the wet filters in a 105 °C stove for 24 h. The filters were  
185 then incinerated at 550 °C for 2 h, and weighted.

186

### 187 **Amplicon sequencing**

188 DNA was extracted from 0.5-7 mg biomass using DNeasy Powersoil microbial extraction kit  
189 (Qiagen, Hilden, Germany) accordingly to manufacturer's instructions and stored at -20°C. The  
190 compositions of the bacterial communities of the mixed liquors were characterized from the samples  
191 collected by V3-V4 16S rRNA gene-based amplicon sequencing as in (Cerruti, Stevens, et al., 2020).  
192 The fastq files provided from Novogene were analysed with QIIME2 pipeline (Bolyen et al., 2019).

193

### 194 **Chromatography analysis of substrate conversions and fermentation products**

195 Substrate depletion (acetate and glucose) and fermentation products formation (succinate, propionate,  
196 formate, lactate, acetate, butyrate) and were scanned and monitored using high-performance liquid  
197 chromatography (HPLC) (Waters, 2707, NL) equipped with an Aminex HPX-87H column (BioRad,  
198 USA) column. The eluent used was  $\text{H}_3\text{PO}_4$  (1.5 mmol  $\text{L}^{-1}$ ) at a flowrate of 0.6 mL  $\text{min}^{-1}$  and at a  
199 temperature of 60°C. The compounds were detected by refraction index (Waters 2414, US) and UV  
200 (210 nm, Waters 2489, US). Ethanol was quantified through gas-chromatography as in (Julius L  
201 Rombouts et al., 2019a).

202

### 203 **Wavelength scans of biomass samples to track PPB**

204 Wavelength scan of biomass samples were done using a spectrophotometer (DR3900, Hach,  
205 Germany) in order to evaluate the presence of the typical PPB photopigments (carotenoids at 400-

206 500 nm and bacteriochlorophyll at ca 850 nm). Absorbance profiles were measured at each wavelength  
207 between 320 nm and 999 nm.

208

### 209 **Solver for pathway utilization prediction**

210 To evaluate the fractions of metabolic fermentation and phototrophic pathways, a numerical model  
211 was set up which could estimate pathway fractions through minimizing the residual sum squared error  
212 (SSQ) using Microsoft Excel 16.48, using the following formula:

$$\min(SSQ) = \min\left(\sqrt{\sum_{i=1}^n \frac{(\hat{y}_i - y_i)^2}{n}}\right) \quad (\text{eq. 1})$$

213

214 Where  $\hat{y}_i$  is the modelled yield value and  $y_i$  is the measured yield value, and  $n$  is the amount of  
215 metabolic compounds that are considered. The estimated yields were calculated using different  
216 fractions of metabolic pathways, which could be varied by the solver to minimize the SSQ (**Table 3**).  
217 This SSQ value was minimized using the Generalized Reduced Gradient (GRG) Nonlinear solver  
218 available in Excel. The pathways that were used varied per enrichment, depending on the microbial  
219 community structure, assuming only the activity of relevant catabolic and anabolic pathways. To  
220 simulate the batch enrichments the equations 1.1-1.8 were used. To simulate the CSTRs, reactions  
221 1.9-.10 were also added (Table 3). The result of the pathway modelling was used to create **Figure 7**,  
222 visualizing in a semi-quantitative way the flux distribution of the different pathways.

223

224 **Table 3.** Putative reactions included in the numerical model of metabolic reactions along FCB and PPB pathways. The  
225 reactions 1.1-1.8 were used to evaluate the contribution of each pathway under batch conditions. The reactions 1.9 and  
226 1.10 were included in the simulation of the CSTRs.

227

| Microbial guilds | Pathways                                                                                                       | Reactions |
|------------------|----------------------------------------------------------------------------------------------------------------|-----------|
| <b>FCB</b>       | Glucose $\rightarrow$ Biomass + CO <sub>2</sub>                                                                | (1.1)     |
|                  | Glucose $\rightarrow$ Ethanol + CO <sub>2</sub>                                                                | (1.2)     |
|                  | Glucose + H <sub>2</sub> O $\rightarrow$ Acetate + Ethanol + H <sup>+</sup> + H <sub>2</sub> + CO <sub>2</sub> | (1.3)     |
|                  | Glucose $\rightarrow$ Butyrate + CO <sub>2</sub> + H <sub>2</sub> O                                            | (1.4)     |
|                  | Glucose $\rightarrow$ Succinate                                                                                | (1.5)     |
|                  | Glucose $\rightarrow$ Lactate + H <sup>+</sup>                                                                 | (1.6)     |
|                  | Lactate $\rightarrow$ Acetate + Propionate + CO <sub>2</sub> + H <sub>2</sub> O                                | (1.7)     |
| <b>FCB + PPB</b> | Formate $\rightarrow$ CO <sub>2</sub> + H <sub>2</sub>                                                         | (1.8)     |
| <b>PPB</b>       | Acetate $\rightarrow$ Biomass + CO <sub>2</sub>                                                                | (1.9)     |
|                  | CO <sub>2</sub> + H <sub>2</sub> O $\rightarrow$ Biomass + H <sub>2</sub>                                      | (1.10)    |

228

229

## 230 **RESULTS & DISCUSSION**

231 The batch and continuous reactor experiments revealed key insights on the microbial community  
232 engineering principles governing the selection, competition and interaction between FCB and PPB in  
233 function of substrates, light patterns, and reactor regimes.

234

### 235 **Batch conditions**

#### 236 *In mixed-culture batch mode, PPB were selected on acetate and IR light*

237 Under batch conditions, the acetate-fed cultures grew only when subjected to light, reaching a  
238 biomass concentration of 1 gVSS L<sup>-1</sup> ( $\mu = 0.0411 \pm 0.0007$  h<sup>-1</sup>), with a yield of biomass on substrate

239 of  $0.60 \pm 0.09$  C-mmol $\times$  C-mmol $s^{-1}$ . Little growth was reported in the six days of cultivation for the  
240 acetate cultures in the dark, with a biomass specific growth rate ( $\mu$ ) of  $0.006$  h $^{-1}$ .

241 The inocula of the batches originated from a PPB in-house enrichment culture operated as SBR in  
242 parallel to the experiments. The inoculum seeded in the acetate-fed batches presented a relative  
243 abundance above 60% (vs. total amplicon sequencing read counts) of the purple non-sulfur genus  
244 *Rhodopseudomonas*. In the acetate-fed batches, *Rhodopseudomonas* sp. reached as high as 80% of  
245 the total community after 6 days of cultivation under IR light. Despite the low growth,  
246 chemoorganoheterotrophs of the family of the *Moraxellaceae* showed the highest relative abundance  
247 (80%) in the dark (**Figure 1A**).

248 Acetate is one of the preferred substrates for PPB (Blankenship et al., 1995). It is assimilated into  
249 biomass by many PPB species, through the tricarboxylic acids cycle (Pechter et al., 2016). Acetate  
250 and IR light selected for *Rhodopseudomonas* under acetate/light conditions. Among the PPB,  
251 *Rhodopseudomonas* has the highest growth rate on acetate ( $\mu_{\max} = 0.15$  h $^{-1}$ ) (Cerruti, Ouboter, et al.,  
252 2020) and therefore was predominant at the end of the batch cultivation. The growth rate in the  
253 acetate-fed cultures under dark conditions was 7 times lower than under light conditions, and the  
254 biomass concentration after 6 days was 270 times lower than under light conditions. Under dark  
255 conditions, acetate can only be assimilated in presence of suitable electron acceptors (such as S $^0$  or  
256 SO $_4^{2-}$ ) in order to produce ATP for growth (Madigan et al., 1982). In the batches, little external  
257 electron acceptor was present in the medium (3 mmol SO $_4^{2-}$  L $^{-1}$ ). This can explain the very low  
258 biomass growth under dark conditions compared to the light one.

259

260 ***In mixed-culture batch mode, FCB were selected on glucose***

261 In the glucose-fed batches a higher biomass concentration was reached in the dark (1 gVSS L $^{-1}$ ) than  
262 in the light (0.4 gVSS L $^{-1}$ ), with a specific  $\mu$  of  $0.070 \pm 0.001$  h $^{-1}$  and  $0.020 \pm 0.002$  h $^{-1}$  respectively.

263 The inoculum of glucose-fed batches was dominated by the purple sulfur genus *Thiobaca*, due to  
264 microbial community variations in the parent reactor. In the glucose batch cultivation, the genus of  
265 *Enterobacter* was predominant, above 90% of the total sequencing reads (**Figure 1A**), both under  
266 light and dark conditions. The pH was not controlled in batch cultivations: in the glucose-fed batches  
267 pH dropped to 4 within 48 h, despite the presence of the HEPES buffer (**Figure 1B**).

268 The *Enterobacteriaceae* family is known to be predominant in anaerobic environment in presence of  
269 non-limiting concentration of monomeric carbohydrates, such as glucose (de Vrije & Claassen, 2003)  
270 (de Vrije & Claassen, 2003). Rombouts et al., 2019 reported an enrichment of 75% of the genus  
271 *Enterobacter* in a glucose-fed SBR, in nutrient, temperature and pH conditions similar to the one here  
272 presented.

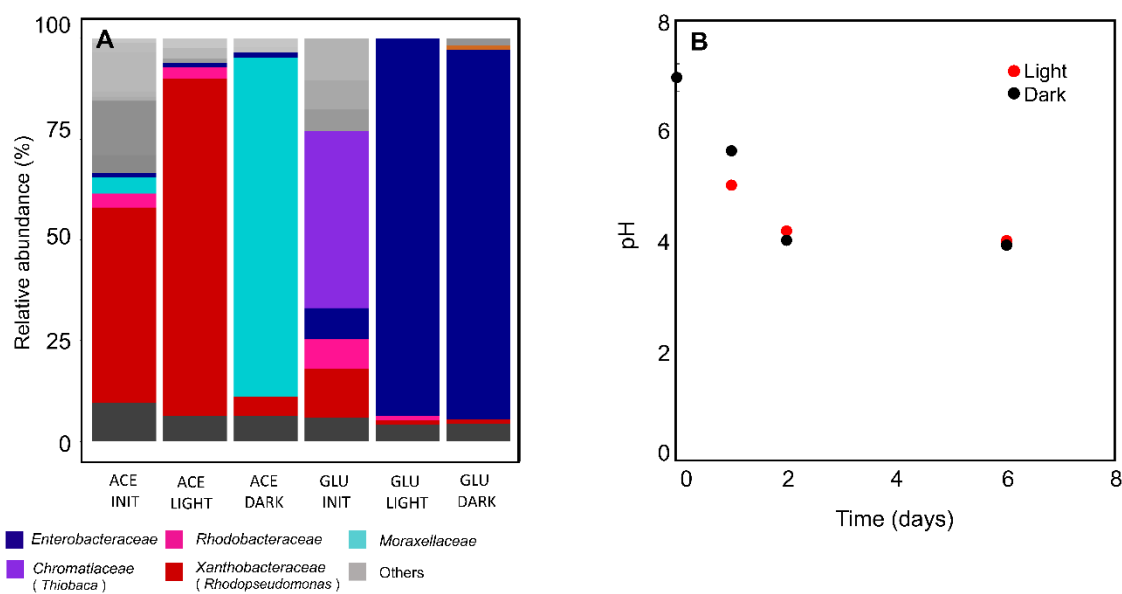

273  
274 **Figure 1. A:** Microbial community composition in batches. PPB are dominant at the beginning of the cultivation (ACE  
275 INIT and GLU INIT). After 6 days of cultivation under acetate feed, PPB were dominant under light conditions (ACE  
276 LIGHT). Under acetate-dark conditions there was little grow from the genus *Moraxellaceae*. Under glucose feed,  
277 independently of the light conditions, the genus *Enterobacteriaceae* was dominant. **B:** pH evolution in the glucose-fed  
278 batches. Both under light and under dark conditions the pH dropped to 4 in the first 2 days of incubation.

279 ***Ethanol was the main fermentation product under glucose-fed batch conditions***

280 Under acetate-fed batch conditions in the light, acetate was fully depleted after 6 days of incubation.

281 Under glucose-fed batch conditions the biomass yield over glucose were  $0.052 \pm 0.002$  C-mmol<sub>x</sub> C-

282 mmol<sub>s</sub><sup>-1</sup> and  $0.134 \pm 0.011$  C-mmol<sub>x</sub> C-mmol<sub>s</sub><sup>-1</sup> under light and under dark conditions respectively.

283 After six days of cultivation, in the glucose-fed batches in the dark, ethanol was the main fermentation

284 product, with a yield of  $0.20 \pm 0.10$  C-mmol<sub>et</sub> C-mmol<sub>s</sub><sup>-1</sup>, followed by succinate ( $0.07 \pm 0.03$  C-

285 mmol<sub>succ</sub> C-mmol<sub>s</sub><sup>-1</sup>) and acetate ( $0.03 \pm 0.01$  C-mmol<sub>ace</sub> C-mmol<sub>s</sub><sup>-1</sup>). In the glucose-fed batches

286 under light conditions, after 6 days of cultivation 30% of the initial glucose was still present in the

287 reaction broth, and carbon balances could not be properly closed (>90% recovery). Ethanol was the

288 main fermentation product ( $0.10 \pm 0.07$  C-mmol<sub>et</sub> C-mmol<sub>s</sub><sup>-1</sup>), followed by lactate ( $0.05$  C-mmol<sub>lac</sub>

289 C-mmol<sub>s</sub><sup>-1</sup>) and succinate ( $0.04 \pm 0.02$  C-mmol<sub>succ</sub> C-mmol<sub>s</sub><sup>-1</sup>).

290

291 A solver enabled to evaluate the theoretical contribution of 8 putative fermentation pathways to the

292 overall carbon and electron balances. Under batch conditions the phototrophic pathways were not

293 included in the simulation, as PPB relative abundance was very low as measured by amplicon

294 sequencing (~1%) (**Figure 1A**). The predicted contribution of the singular pathways to the overall

295 yields of the batches under light and dark conditions were comparable. Under batch conditions, the

296 dominant metabolic pathway was identified as homo-ethanol production form glucose (**Table 3**, Eq.

297 1.2). This catabolism is associated with the fermentative *Enterobacteriaceae* (Jang et al., 2017).

298

299 Wavelength scan is commonly used as an indirect measure for the presence of PPB in the cultures

300 (Fiedor et al., 2016), as photopigments absorb photons with specific wavelengths. Absorbance peaks

301 around 400-500 nm represent the carotenoids series, and the peaks around 850 nm the

302 bacteriochlorophyll a (Stomp et al., 2007). In the acetate-based batches in the light the

303 aforementioned peaks were clearly detected at 450 nm and 800-850 nm. In the acetate-fed batches in



304 the dark, almost no growth was reported in the 6 days incubation and peak for photopigments was  
305 detected at 800 and 850 nm. In the glucose-fed batches, both dark and light, no peaks were observed  
306 (**Figure 2A/B**). These results suggested the selective growth of PPB in illuminated acetate batches,  
307 and of non-phototrophic organisms in the glucose-batches.

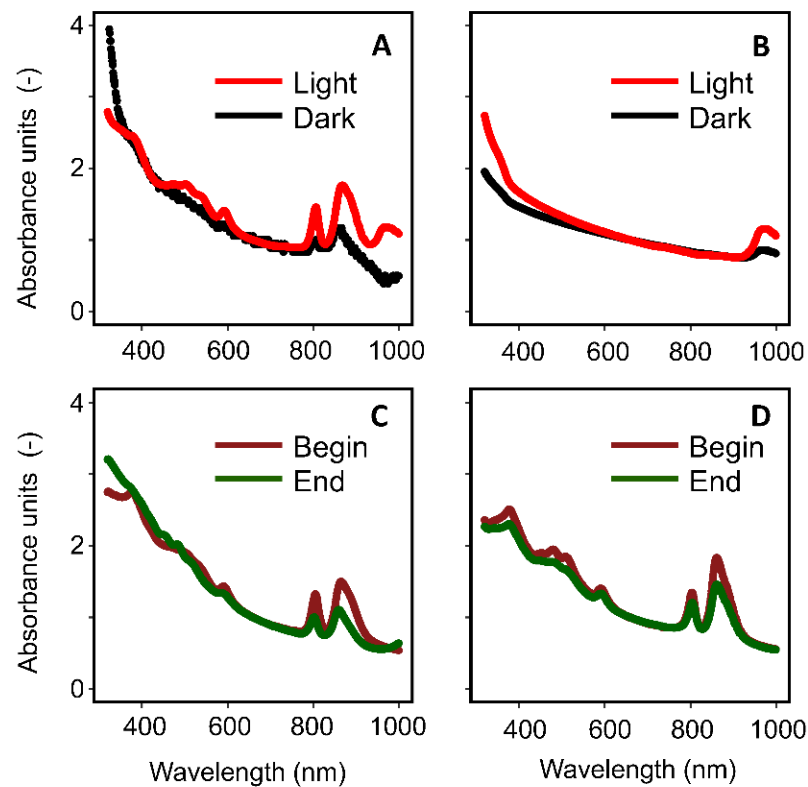

308

309 **Figure 2.** Wavelength scan from 300 to 1000 nm. Absorbance units normalized for the biomass concentration (as A.U.  
310 at 660nm). **A:** acetate-fed batches. The typical PPB peaks (at ca 850 nm) were clearly visible under light conditions. **B:**  
311 glucose-fed batches. No peak was present. **C:** continuous light glucose-fed CSTR. The presence of PPB was confirmed  
312 by the presence of their typical peaks. **D:** dark / light glucose-fed CSTR. The presence of PPB was confirmed by the  
313 presence of their typical peaks.

314

315 *Enterobacteriaceae were enriched due to higher growth rates*

316 The maximum biomass specific growth rate ( $\mu_{\max}$ ) is a key factor driving selection mechanisms in  
317 substrate-rich environments (Winkler et al., 2017), if no significant intermediate storage of substrate

318 is displayed. FCB-like species of the genus *Enterobacter* present a  $\mu_{\max}$  of 0.45 – 0.80 h<sup>-1</sup> in mineral  
319 medium conditions with low sugar concentrations (<10 g<sub>COD</sub> L<sup>-1</sup>) (Füchslin et al., 2012; Rombouts et  
320 al., 2019). When fermenting carbohydrates like glucose, *Rhodopseudomonas capsulata* grows at a  
321  $\mu_{\max}$  of 0.014 h<sup>-1</sup> (Conrad & Schlegel, 1978). In batches, where the substrate is not limiting, the  
322 organisms with higher uptakes rates will be selected above organisms with high biomass yields  
323 (Rombouts et al 2019). According to the Herbert-Pirt relation, when the substrate uptake is directly  
324 coupled with growth, the organisms with the highest growth rate dominate. Using these studies, the  
325 genus *Enterobacter* is estimated to have a  $\mu_{\max}$  about 32 times higher than *Rhodopseudomonas* under  
326 glucose feed, making it successful in the competition for glucose in batch.

327 Under batch conditions, both in the light and in the dark, the family of the *Enterobacteriaceae* was  
328 enriched (>90%). The species belonging to the family of the *Enterobacteriaceae* ferment sugars  
329 through either the Embden-Meyerhof pathway or the pentose phosphate pathway, with a net  
330 production of ethanol (Jang et al., 2017). Ethanol can be used as substrate for growth by PPB, but  
331 with a strict pH regulation (pH = 7) (Inui et al., 1995).

332 Due to lactate production, which is a major byproduct of ethanol fermentation (Converti & Perego,  
333 2002), and insufficient pH buffer, the pH dropped to 4 within the first 2 days of cultivation, as the  
334 pK<sub>a</sub> of lactic acid is 3.8 (**Figure 1B**). Fermentative bacteria can still grow at low pH (pH < 5.5) (Tsuji  
335 et al., 1982). PPB grow instead in a pH range between 6.5 and 9.0, with an optimum at 7.0 (Pfennig,  
336 1977). The low pH (pH = 4) resulting from the glucose-fed batch experiments could have prevented  
337 the PPB to uptake and grow on the alcohols and VFAs produced by *Enterobacter*, leading to a low  
338 relative abundance (~ 1%) in the glucose-fed batches. We postulate that with a strict pH control to 7,  
339 PPB will be able to grow on fermentation products of *Enterobacteriaceae*.

340 The genus *Enterobacter* can grow in a range of temperature between 20 and 45°C (Gill & Suisted,  
341 1978), with an optimum growth temperature at 40°C (Tanisho, 1998). The temperature differences

342 here reported for glucose-fed batches under dark and light (ca. 7°C difference) should not have  
343 affected its specific growth rates. On the other hand, light has been used as a control method for  
344 fermentative organism proliferation (D’Ercole et al., 2016; Gwynne & Gallagher, 2018). As IR light  
345 was provided to the illuminated cultures, we postulate its inhibitory action on the *Enterobacteriaceae*  
346 family, resulting in lower growth rates (3.5 times lower) compared to the dark cultures. How this  
347 inhibition by photons actually works on cellular and molecular level remains to be settled by future  
348 work.

349

### 350 **Continuous culture**

351 Under continuous-flow regime, four different light and substrate conditions were imposed (1- acetate  
352 under light, 2- acetate under light / dark cycles, 3- glucose under light, and 4- glucose under light and  
353 dark cycles). The pH was controlled at 7.0 to favor the enrichment of PPB.

354

### 355 ***CO<sub>2</sub> production rate increased with an increased biomass growth***

356 The CO<sub>2</sub> partial pressure in the off-gas of the CSTR was monitored to evaluate the growth state of  
357 the biomass. For PPB, CO<sub>2</sub> production is a side product of acetate assimilation (Sadaie et al., 1997).  
358 In acetate-fed CSTRs, CO<sub>2</sub> production was constant under continuous illumination ( $0.0111 \pm 0.0004$   
359 C-mmol<sub>CO<sub>2</sub></sub> C-mmol<sup>-1</sup>) (**Figure 3A**). When dark / light cycles were applied, the CO<sub>2</sub> production  
360 decreased to 0 C-mmol h<sup>-1</sup> during the 8 h dark periods and increased again to 0.3 C-mmol h<sup>-1</sup> during  
361 the 16 h light phases (**Figure 3B**). The CO<sub>2</sub> production during the light phases indicated that acetate  
362 was continuously assimilated, whereas the sudden decrease during the dark periods (1/3 less within  
363 the first hour of dark) indicated that the metabolic activity was switched off. An oscillation in the  
364 CO<sub>2</sub> production rate was already observed in *Rhodospseudomonas* pure cultures under CSTR (Cerruti  
365 et al., 2020). In both cases, when the substrate was provided in excess, PPB grew with a growth rate  
366 close to  $\mu_{\max}$  (0.1 h<sup>-1</sup>) during the light periods. In the dark, PPB halted their metabolic activity.

367 Both under continuous illumination and dark/light cycles, a change in CO<sub>2</sub> production was observed  
368 24-48 h after the switch from acetate feed to glucose feed. In the CSTR under continuous illumination,  
369 a peak of CO<sub>2</sub> production reached 1.2 C-mmol h<sup>-1</sup> 24 h (ca 1 HRT) after the switch to the glucose  
370 feed and stabilized at 0.6 C-mmol h<sup>-1</sup> 2 days later (**Figure 3A**). Under light / dark cycles a peak of  
371 CO<sub>2</sub> production (up to 5.6 C-mmol h<sup>-1</sup>) was observed after two full cycles (3.8 HRTs from the glucose  
372 switch). After 8 HRTs from the switch to the glucose feed, the CO<sub>2</sub> production rate presented  
373 oscillations between light and dark periods. The CO<sub>2</sub> production rate increased of 0.5 C-mmol h<sup>-1</sup>  
374 at the beginning of the light phase and it decreased of 0.4 C-mmol h<sup>-1</sup> in every dark period (**Figure 3B**).  
375 This behavior was observed for 8 HRTs, until the pH dropped to 2 due to a technical failure.  
376

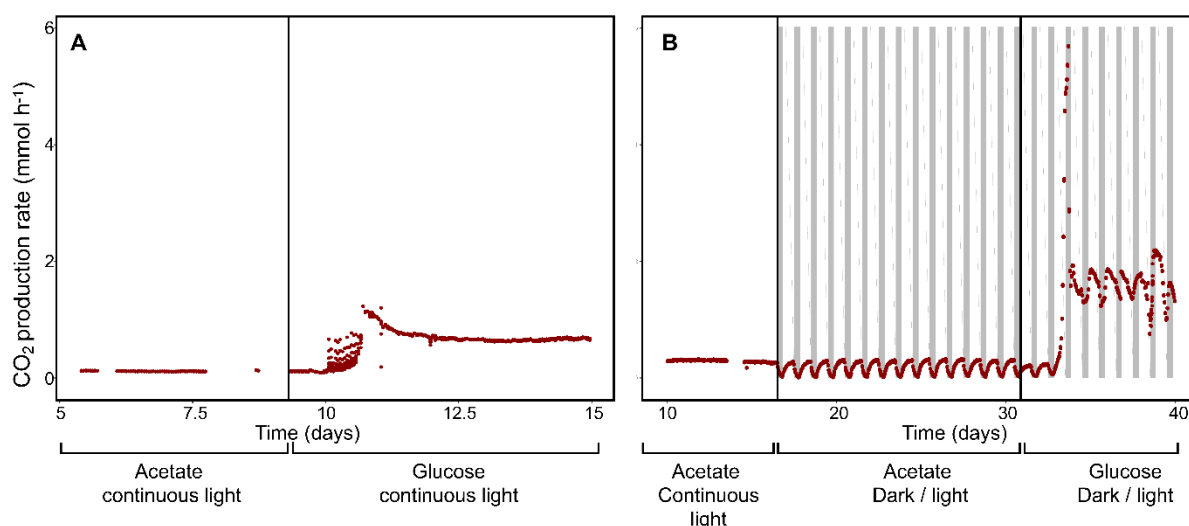

377

378 **Figure 3. A:** CO<sub>2</sub> production rates under acetate-fed and glucose-fed CSTR continuous light conditions. An increase of  
379 ca 1 mmol h<sup>-1</sup> was observed 3 days after the switch to glucose feed, and then stabilized. **B:** CO<sub>2</sub> production rates under  
380 acetate continuous light, acetate dark / light and glucose dark / light conditions. Under acetate continuous illumination  
381 CO<sub>2</sub> was produced at constant rate. Under acetate dark / light CO<sub>2</sub> was produced only during the light periods. Under  
382 glucose dark / light conditions, a peak in production rate was observed after 3 days from the switch to the glucose-feed.  
383 The production rates increased during dark periods and decreased during light periods.

384

385 ***Ethanol was the main fermentation product also in glucose-fed CSTR***

386 Under glucose-fed CSTR conditions, the biomass yield over glucose was  $0.22 \pm 0.02$  C-mmol<sub>X</sub> C-  
387 mmols<sup>-1</sup> and  $0.45 \pm 0.12$  C-mmol<sub>X</sub> C-mmol<sub>S</sub><sup>-1</sup> under continuous illumination and light / dark cycles  
388 respectively. Ethanol was the main measured fermentation product ( $0.18 \pm 0.06$  and  $0.11 \pm 0.10$  C-  
389 mmol<sub>et</sub> C-mmol<sub>S</sub><sup>-1</sup> under continuous light and dark / light cycles respectively). In the CSTR under  
390 continuous illumination also acetate was measured ( $0.21 \pm 0.15$  C-mmol<sub>ace</sub> C-mmol<sub>S</sub><sup>-1</sup>) and butyrate  
391 ( $0.06 \pm 0.05$  C-mmol<sub>but</sub> C-mmol<sub>S</sub><sup>-1</sup>). In the CSTR under dark / light cycles, formate ( $0.11 \pm 0.01$  C-  
392 mmol<sub>form</sub> C-mmol<sub>S</sub><sup>-1</sup>) and butyrate ( $0.10 \pm 0.01$  C-mmol<sub>but</sub> C-mmol<sub>S</sub><sup>-1</sup>) were measured (**Figure 4**).

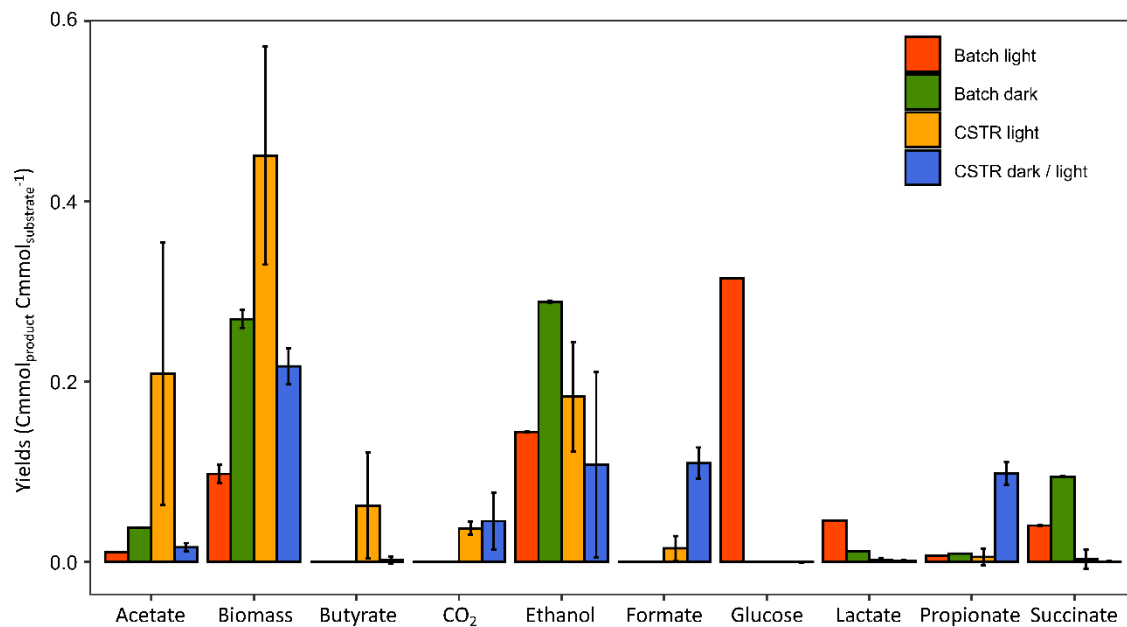

393

394 **Figure 4.** Yields of the glucose-fed cultures. Under batch conditions, the main fermentation products were ethanol and  
395 succinate. Under light conditions, glucose was not fully depleted. Under CSTR conditions, the main fermentation products  
396 were ethanol, formate and acetate.

397

398 Under CSTR conditions, photoautotrophic CO<sub>2</sub> fixation (photosynthesis) and photoheterotrophic  
399 acetate assimilation were added to the solver matrix, to evaluate the contribution of PPB to the total  
400 carbon and energy balances. Under all CSTR conditions the major fermentation pathway involved

401 the glucose fermentation through the acetyl-CoA pathway (**Figure 5**) (83% and 55% for continuous  
 402 illumination and dark / light cycles respectively). The solver estimated a high contribution of the  
 403 photoautotrophic pathway in the CSTR under continuous illumination, and of the photoheterotrophic  
 404 pathway under dark / light cycles.

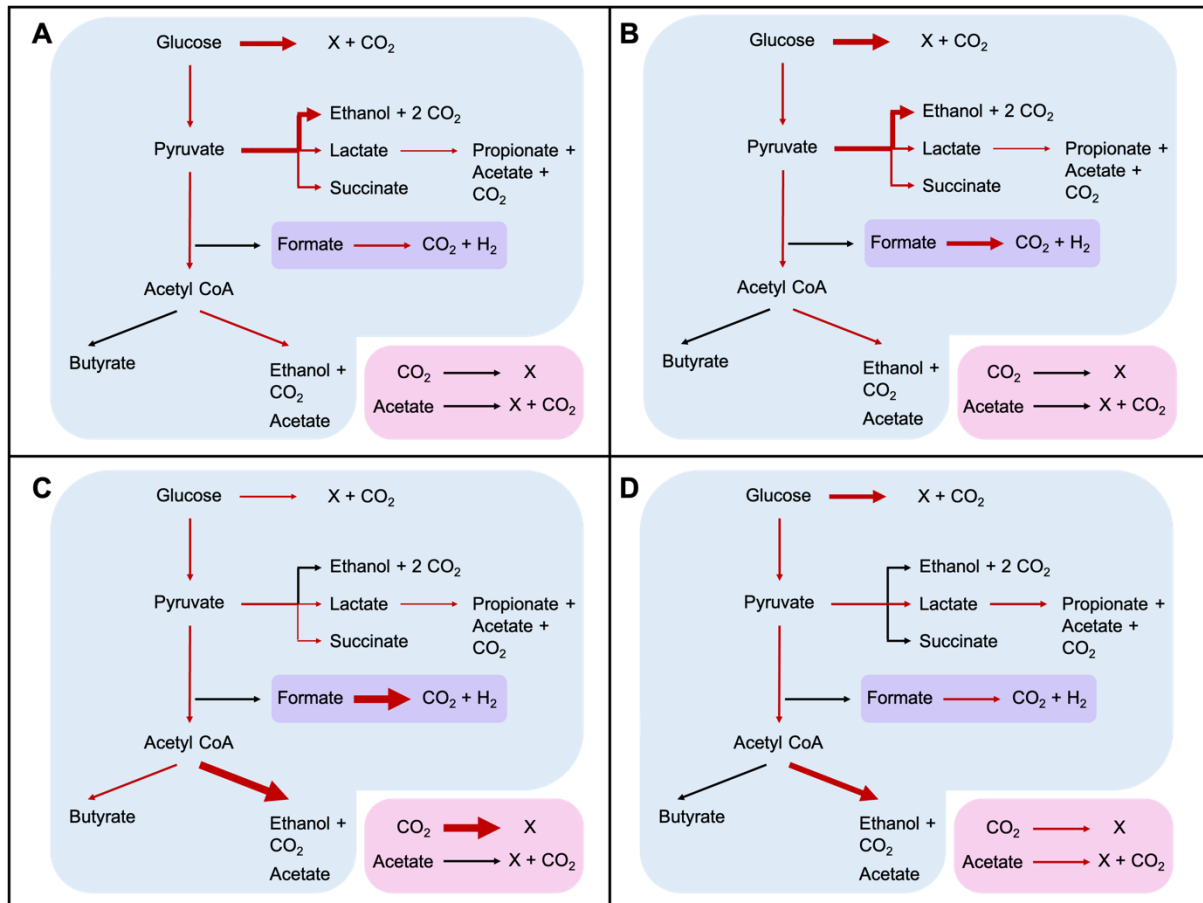

405  
 406 **Figure 5.** Pathways involved under the different reactor regimes. The thickness of the arrows represents the predicted  
 407 yield toward a specific metabolic route, based on the calculations of the solver. The reactions with the blue background  
 408 are performed by FCB. The reaction with the purple background is performed by both FCB and PPB. The reactions with  
 409 the pink background are performed by PPB. **A:** batch conditions with continuous illumination. **B:** batch conditions in the  
 410 dark. **C:** CSTR under continuous illumination. **D:** CSTR conditions under light / dark cycles. Under batch conditions the  
 411 pathways used were mainly directed toward biomass and ethanol production. Under CSTR ethanol was the main  
 412 fermentation product, but the production of propionate, succinate and lactate was predicted. The phototrophic pathways  
 413 were not included for the batch conditions but were included in the carbon and electron balance of the CSTRs.

414

415 ***PPB were enriched in the acetate-fed CSTR***

416 Under continuous illumination and with acetate as carbon and electron source PPB formed the  
417 dominant guild (on average  $68 \pm 21$  %) (**Figure 6**). The genus *Rhodopseudomonas* was predominant  
418 at the beginning of the CSTR (65%), while its relative abundance decreased to 40% after one week  
419 of cultivation (8.5 HRT). Simultaneously, the genus *Rhodobacter* got enriched (from 13 to 23%). A  
420 further enrichment of *Rhodobacter* was observed once the light/dark cycles were applied, reaching  
421 around 65% of the total population after 15.6 HRTs, while *Rhodopseudomonas* abundance was stable  
422 below 10%.

423

424 In the acetate-fed CSTR under continuous light the biomass concentration was not constant. Once the  
425 dark / light cycles were applied, the biomass production followed the irradiation pattern. The biomass  
426 reached a concentration of  $44.75 \pm 1.24$  C-mmol L<sup>-1</sup> after the light periods, and it decreased to  $37.58$   
427  $\pm 0.09$  C-mmol L<sup>-1</sup> after the dark periods. Under anaerobic conditions, PPB do not grow in the dark  
428 in absence of an external electron donor (Madigan et al., 1982; Yen & Marrs, 1977), but growth is  
429 restored once the light is present (Cerruti et al., 2020; Zhi et al., 2019). The biomass concentration  
430 increased without stabilizing in the light periods, as in (Cerruti et al., 2020). Acetate was not  
431 consumed during the dark phases, and its concentration increased due to continuous supply in the  
432 CSTR. In a chemostat, the growth rate of the microbial community is defined by the dilution rate and  
433 the concentration of the limiting compound, if no biofilm is formed (Kuenen, 2019). An increase in  
434 biomass concentration during the illumination times implied that the growth rate of the  
435 microorganisms ( $0.1$  h<sup>-1</sup>) was higher than the dilution rate ( $0.04$  h<sup>-1</sup>), as a consequence of high residual  
436 acetate concentration. During the dark cycles, acetate consumption stopped, acetate accumulated, to  
437 be used in light cycles by the PPB organisms. This a higher growth rate than the applied dilution rate,  
438 which fits with standard Monod kinetics for growth.

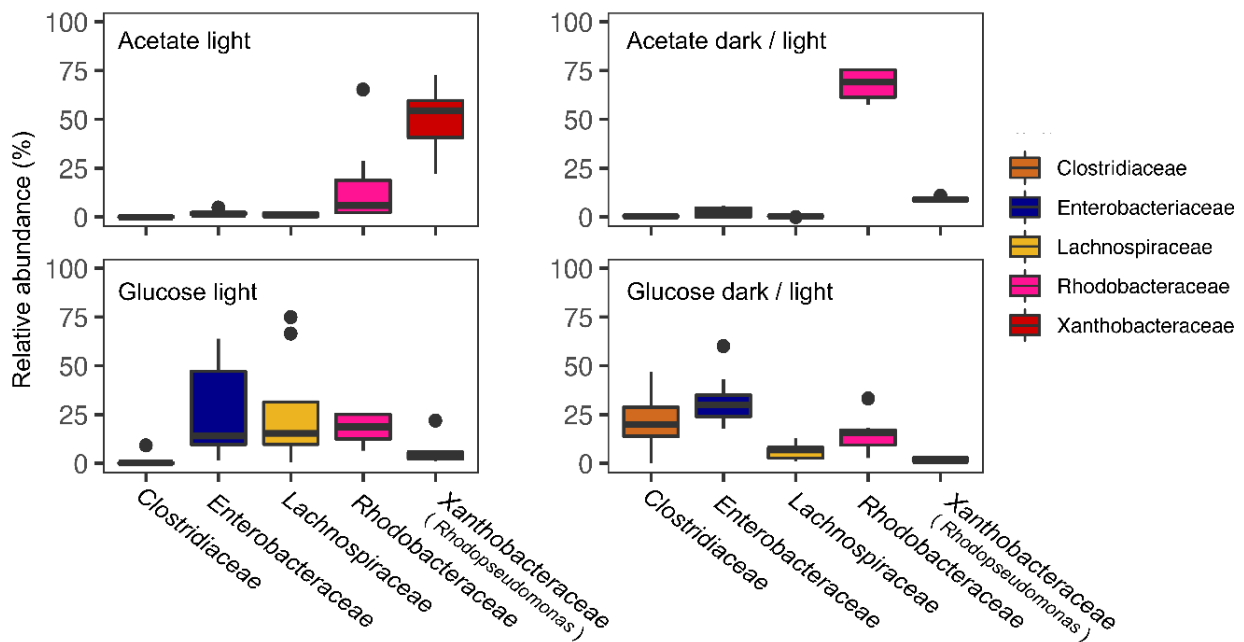

439

440 **Figure 6.** Relative abundance under CSTR conditions. Under acetate conditions, PPB were dominant community, with a  
 441 shift from *Rhodospseudomonas* under continuous illumination to *Rhodobacter* under light / dark conditions. Under glucose  
 442 feed, the FCB were dominant, especially the genera *Enterobacteriaceae* and *Lachnospiraceae*.

443

#### 444 ***FCB were enriched in the glucose-fed CSTR***

445 In the CSTR, FCB accounted for more of the 50% of the sequences under glucose feed, regardless  
 446 the light condition. In CSTR, light and dark cycles had an impact on the selection process of the FCB.  
 447 Under continuous illumination, the family of *Lachnospiraceae* was predominant (around 30 % of the  
 448 total community, with a peak at 75%), followed by the family of *Enterobacteriaceae* (15%) (**Figure**  
 449 **6**). Under light/dark cycles *Enterobacteriaceae* was the most predominant ( $32 \pm 17$  %), along with  
 450 *Clostridiaceae* ( $18 \pm 15$  %).

451 Among the PPB guild, *Rhodobacter* was the only PPB to significantly persist in the glucose-fed  
 452 CSTR, with an average relative abundance of  $19.5 \pm 14$  % (**Figure 6**) independently of the light  
 453 conditions. The persistence of PPB in the glucose-fed CSTRs was further proven by the wavelength



454 scan. Peaks for the bacteriochlorophyll and the carotenoids were identified at 400-450, 800 and 850  
455 nm for both the continuous illumination and the light / dark cycles (**Figure 2C/D**).

456  
457 ***The microbial community defined the fermentation products production***

458 The families of *Clostridiaceae*, *Enterobacteriaceae* and *Lachnospiraceae* are able to ferment glucose.  
459 They compete for glucose through different fermentation pathways (Grimmler et al., 2011; Horiuchi  
460 et al., 2002). *Lachnospiraceae* and *Clostridiaceae* are phylogenetically and morphologically  
461 heterogeneous families belonging to the phylum of *Firmicutes* (De Vos et al., 2005). Glucose  
462 fermentation through the acetyl-CoA pathway is typical of *Clostridiaceae* (Aristilde et al., 2015). In  
463 human gut microbiota, they contribute to sugar fermentation to lactate and short-chain fatty acids  
464 production (Venegas et al., 2019). Butyrate was produced only in the CSTR under continuous  
465 illumination ( $0.06 \pm 0.05$  C-mmol C-mmols<sup>-1</sup>). The *Lachnospiraceae* and *Clostridiaceae* families  
466 ferment glucose into primarily butyrate, acetate and ethanol (Rombouts et al., 2019b; Temudo et al.,  
467 2008; Valk et al., 2018). Butyrate is produced through the butyryl-CoA dehydrogenase gene,  
468 responsible for the conversion of crotonyl-CoA to butyryl-CoA and the butyryl-CoA:acetyl-CoA  
469 transferase (Venegas et al., 2019). According to the NCBI database (NCBI, 2021), the gene encoding  
470 for this enzyme is present in the phylum of *Firmicutes* that comprises *Clostridiaceae* and  
471 *Lachnospiraceae* relatives, but not in the proteobacterial family of the *Enterobacteriaceae*,  
472 explaining the absence of butyrate in the glucose-fed batches.

473 Under dark / light CSTR conditions, the relatively high production of propionate ( $0.10 \pm 0.01$  C-  
474 mmol C-mmols<sup>-1</sup>, 17 times higher than under continuous illumination), can be linked to the  
475 abundance of *Clostridiaceae*, which are propionate producers (Johns, 1952). *Clostridium* species can  
476 present a  $\mu_{\max}$  of  $0.25$  h<sup>-1</sup> (Gomez-Flores et al., 2015) with primary fermentation products including  
477 ethanol, butyrate, acetate and propionate (Huang et al., 1986; Lamed et al., 1988). *Clostridium*  
478 *beijerincki* has been reported to decrease the H<sub>2</sub> production when exposed to light intensities above

479 200 W m<sup>-2</sup>, with a shift from a preferential production of butyric acid to acetic acid (Zagrodnik &  
480 Laniecki, 2016). The continuous illumination under CSTR conditions might have resulted in an  
481 inhibition of *Clostridiaceae*, with an enrichment of other *Firmicutes* like *Lachnospiraceae*, through  
482 an unknown mechanism.

483 Formate and propionate production was 10 times higher under light/ dark conditions compared to  
484 continuous illumination. Acetate production was instead 12 times lower under dark / light cycles  
485 compared to the continuous illumination (**Figure 4**). This was probably linked to a higher abundance  
486 family of the *Enterobacteriaceae* under dark / light cycles compared to the continuous illumination  
487 (31% and 18% respectively) (**Figure 6**). *Enterobacteriaceae* present a  $\mu_{\max}$  0.5-1 h<sup>-1</sup> (Khanna et al.,  
488 2012; Martens et al., 1999) and are known to ferment sugars to primarily ethanol, with lactate and  
489 acetate as major byproduct during ethanol fermentation (Converti & Perego, 2002).

490

#### 491 ***PPB grew on FCB fermentation products***

492 After 3 months of CSTR operation, to test the hypothesis that PPB grow on the fermentation products  
493 of FCB, the glucose feed was stopped while nitrogen and phosphate were still provided. Along the 4  
494 days of operation, the relative abundance of the PPB shifted from ca 10 to 50% (**Figure 7A**). The  
495 biomass concentration sharply decreased already 2 h after stopping the glucose feed, stabilizing at a  
496 concentration of  $15.7 \pm 2$  C-mmolx L<sup>-1</sup>. Butyrate, ethanol, formate, lactate, propionate and succinate  
497 were washed out of the system at the imposed dilution rate (0.04 h<sup>-1</sup>). Acetate was depleted in 50 h,  
498 4 times faster than the theoretical washout rate (**Figure 7B**). In absence of glucose as carbon source,  
499 the highly active fermentative organisms were not growing. The increase in the PPB relative  
500 abundance proved the interaction with FCB, showing that PPB utilize VFAs as preferred substrate  
501 and can selectively grow on FCB fermentation products.

502

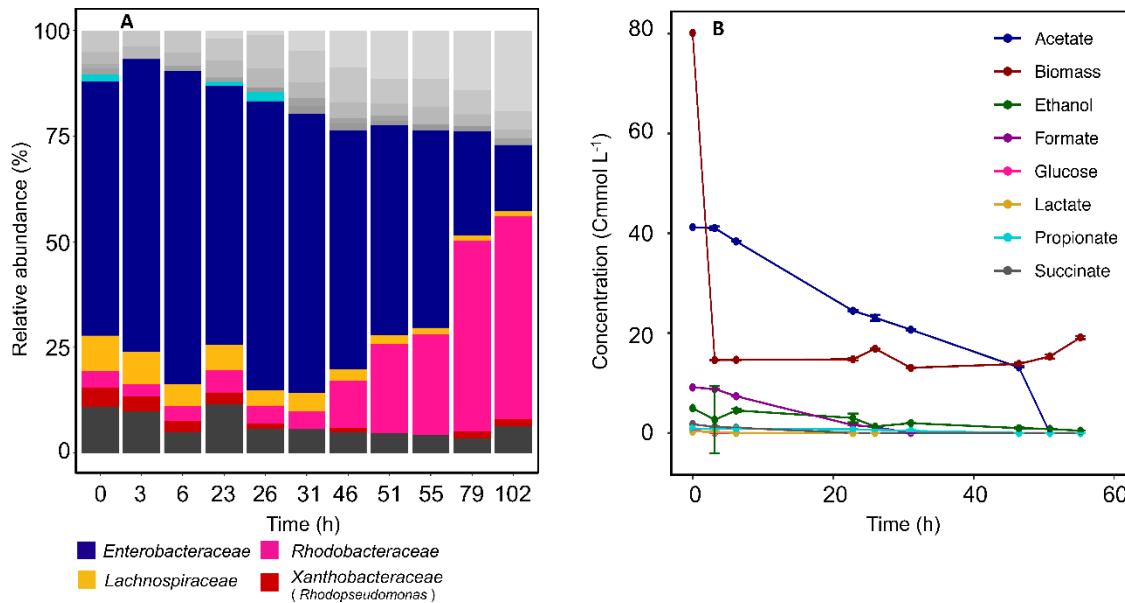

503

504 **Figure 7. A:** Microbial composition after the stop to the glucose feed. Over time, the FCB relative abundance decreased  
505 over time, while the *Rhodobacteraceae* increased. **B:** Fermentation products concentration after the glucose feed-stop.  
506 After 55 h all the fermentation products were depleted.

507

## 508 Outlook

509

### 510 *Metabolic strategies for microbial enrichment*

511 Microorganisms use a combination of adaptive reactions to coexist with other organisms (Panikov,  
512 2010). Based on the adaptation techniques, two major types of organisms can be identified (Andrews  
513 & Harris, 1986; Cowan et al., 2000): r- and K-strategists. The r-strategists show high growth and  
514 conversion rates, in low-populated and resources-rich environments. K-strategists thrive in highly  
515 populated environments, where the resources are limited. They exhibit lower growth rates but high  
516 substrate conversion yields.

517 Under the different reactor regimes, the microbial communities followed this postulate.

518 *Enterobacteriaceae* were predominant under non-limiting conditions can be classified as r-

519 organisms. *Clostridiaceae* and *Lachnospiraceae* showed high growth rates in nutrient-limiting  
 520 environments and can be classified as K-strategists. Among the PPB guild, *Rhodopseudomonas*  
 521 showed a high-rate behaviour, dominating in substrate-rich environments. *Rhodobacter* showed high  
 522 efficiency typical of the K-organisms, being able to survive also to nutrient-limited environments, as  
 523 the CSTRs (**Table 4**).

524

525 **Table 4.** Reported maximum growth rates of the main FCB and PPB in the systems under glucose and acetate feed and  
 526 adaptation strategies.

| Substrates                    | Maximum growth rate $\mu_{\max}$ ( $\text{h}^{-1}$ )     |                                      |                                        |                                          |                                  |
|-------------------------------|----------------------------------------------------------|--------------------------------------|----------------------------------------|------------------------------------------|----------------------------------|
|                               | Fermentative chemoorganoheterotrophic bacteria           |                                      |                                        | Purple photoorganoheterotrophic bacteria |                                  |
|                               | (FCB)                                                    |                                      |                                        | (PPB)                                    |                                  |
|                               | <i>Enterobacteriaceae</i>                                | <i>Lachnospiraceae</i>               | <i>Clostridiaceae</i>                  | <i>Rhodopseudomonas</i>                  | <i>Rhodobacter</i>               |
| <b>Glucose</b>                | 0.3 – 1<br>(Hasona et al., 2004;<br>Khanna et al., 2012) | 0.3<br>(Soto-Martin et<br>al., 2020) | 0.25<br>(Gomez-Flores<br>et al., 2015) | 0.014<br>(Conrad & Schlegel,<br>1978)    | 0.1<br>(Imam et al., 2011)       |
| <b>Acetate</b>                | -                                                        | -                                    | -                                      | 0.15<br>(Cerruti et al., 2020)           | 0.05<br>(Kopf & Newman,<br>2012) |
| <b>Selection<br/>strategy</b> | r-strategist<br>(on glucose)                             | K-strategist<br>(on glucose)         | K-strategist<br>(on glucose)           | r-strategist<br>(on acetate)             | K-strategist<br>(on acetate)     |

527

528 Kinetic parameters define the microbial selection mechanisms in CSTRs (Kuenen, 2019). In the  
 529 CSTRs, the dilution rate was relatively low ( $0.04 \text{ h}^{-1}$ ) compared to the growth rates of the fermentative  
 530 organisms ( $0.5\text{-}1 \text{ h}^{-1}$ ), as it was set to retain PPB in the system. In a continuous culture, the substrate  
 531 (in this case glucose) is the limiting compound, and the organisms with higher affinity for it will be  
 532 predominant (Andrews & Harris, 1986). Within the guild of fermentative organisms, *Clostridiaceae*

533 and *Lachnospiraceae* are expected to have a lower affinity constant ( $K_s$ ) and therefore have  
534 established over *Enterobacteriaceae*. The controlled pH and an appropriate dilution factor ( $D = 0.04$   
535  $h^{-1}$ ) allowed the persistence of PPB. In particular, *Rhodobacter* was enriched in the glucose-fed  
536 CSTRs regardless the illumination conditions. We propose here a syntrophic association of FCB and  
537 PPB for glucose conversion toward  $CO_2$  and biomass (**Figure** ). Glucose was first converted into  
538 acetate, ethanol, formate and lactate, and lactate was further transformed into acetate and propionate.  
539 All the fermentation products can be potentially used by PPB for growth.

540

#### 541 ***Syntrophic associations between FCB and PPB***

542 The interaction between fermentative organisms and purple bacteria is an example of syntrophic  
543 interaction. Syntrophy has been shown in biofilms and sludges, where a mass transport of compounds  
544 occurs between organisms (Rodríguez et al., 2006). Here, we showed the establishment of a metabolic  
545 cooperativity that lead to a multispecies consortium, combining sugar degradation with VFAs  
546 assimilation. In nature, PPB are present in many aquatic environments where IR light is present, and  
547 they have been found also in anthropogenic environments such as WWTPs. They harness their ability  
548 to grow on a diverse range of compounds, creating a wide metabolic net of interaction with other  
549 organisms.

550

551 The syntrophy between FO and PPB is not only important at an ecological level but can also be  
552 exploited for wastewater treatment. The FCB are used to treat food and agricultural wastes, to degrade  
553 sugars and produce biofuels as bioethanol and hydrogen gas of VFAs (Li et al., 2015; Thapa et al.,  
554 2015, 2019). Further efforts have been put to selectively direct PPB bioproduct formation toward one  
555 or another metabolic route (Puyol et al., 2017), with success. PPB, thanks to high biomass yields  
556 (Alloul et al., 2018), harbor a major industrial potential for the production of antioxidants and single-

557 cell proteins. It has been proven that their biomass can be used as feed for shrimps without protein  
558 extraction (Qin et al., 2018).

559

560 *Advantages of single-sludge vs. two-sludge processes for conversions of glucose by FCB and*  
561 *PPB*

562 The single-step bioprocess implemented here has the advantage to simultaneously treat carbohydrate-  
563 rich wastewaters, factually removing the organic pollutants, and enriching organisms with high  
564 industrial potential, by combining the metabolic properties of FCB and PPB in one single sludge. An  
565 integrated single-stage process combining fermentation and purple photoorganoheterotrophy would  
566 allow to treat carbohydrate-rich wastewater in only one tank. The illumination conditions did not  
567 affect the syntrophy between FCB and PPB. A discontinuous illumination would reduce the  
568 operational costs compared to a continuously irradiated system (Qin et al., 2018). Understanding  
569 interactions between the FCB and PPB microbial guilds will help design efficient processes for  
570 carbohydrates-based wastewater treatment and valorization. If the aim is then to maximize and  
571 valorize the PPB biomass, a two-sludge process can be efficient to first ferment carbohydrates in the  
572 first tank selecting for FCB and then supplying the fermentation products like VFAs (whose spectrum  
573 can be engineered by mastering selection conditions) to the PPB tank.

574

575 **Conclusions**

576 FCB and PPB interact as syntrophic organisms. FCB degrade glucose into VFAs, lactate and ethanol.  
577 Acetate was assimilated into biomass by PPB. The operational conditions are crucial to establish an  
578 interaction between the guilds. FCB are more efficient fermenters than PPB (although their metabolic  
579 versatility can allow for fermentation). Under glucose-fed batch regime FCB were enriched over PPB.  
580 Under glucose-fed CSTR conditions PPB population got enriched up to 30% in syntrophic association

581 with FCB. An appropriate dilution rate (0.04 h<sup>-1</sup>) and pH regulation to 7 enabled to enrich PPB in  
582 glucose-rich environments by enabling their metabolic coupling with FCB.

583

#### 584 **ACKNOWLEDGEMENTS**

585 This study was funded by the start-up grant of the TU Delft Department of Biotechnology (Prof.  
586 David Weissbrodt). The authors warmly acknowledge Dirk Geerts, Zita van der Krogt and Ben Abbas  
587 for their technical assistance in fermentation and molecular biology labs at TU Delft.

588

#### 589 **CONFLICT OF INTEREST STATEMENT**

590 The authors share no conflict of interest.

591

#### 592 **REFERENCES**

- 593 Abo-Hashesh, M., & Hallenbeck, P. C. (2012). Microaerobic dark fermentative hydrogen  
594 production by the photosynthetic bacterium, *Rhodobacter capsulatus* JP91. *International*  
595 *Journal of Low-Carbon Technologies*, 7(2), 97–103. <https://doi.org/10.1093/ijlct/cts011>
- 596 Alloul, A., Ganigué, R., Spiller, M., Meerburg, F., Cagnetta, C., Rabaey, K., & Vlaeminck, S. E.  
597 (2018). Capture–Ferment–Upgrade: A Three-Step Approach for the Valorization of Sewage  
598 Organics as Commodities. *Environmental Science & Technology*, 52(12), 6729–6742  
599 <https://doi.org/10.1021/acs.est.7b05712>
- 600 Andrews, J. H., & Harris, R. F. (1986). r- and K-Selection and Microbial Ecology. *Advances in*  
601 *Microbial Ecology* (pp. 99–147). [https://doi.org/10.1007/978-1-4757-0611-6\\_3](https://doi.org/10.1007/978-1-4757-0611-6_3)
- 602 Aristilde, L., Lewis, I. A., Park, J. O., & Rabinowitz, J. D. (2015). Hierarchy in pentose sugar  
603 metabolism in *Clostridium acetobutyricum*. *Applied and Environmental Microbiology*, 81(4),  
604 1452–1462. <https://doi.org/10.1128/AEM.03199-14>
- 605 Blankenship, R., Madigan, M., & Bauer, C. (1995). *Anoxygenic Photosynthetic Bacteria* (R. E.  
606 Blankenship, M. T. Madigan, & C. E. Bauer (eds.); Vol. 2). *Springer Netherlands*.  
607 <https://doi.org/10.1007/0-306-47954-0>
- 608 Bolyen, E., Rideout, J. R., Dillon, M. R., Bokulich, N. A., Abnet, C. C., Al-Ghalith, G. A.,  
609 Alexander, H., Alm, E. J., Arumugam, M., Asnicar, F., Bai, Y., Bisanz, J. E., Bittinger, K.,  
610 Brejnrod, A., Brislawn, C. J., Brown, C. T., Callahan, B. J., Caraballo-Rodríguez, A. M.,  
611 Chase, Caporaso, J. G. (2019). Reproducible, interactive, scalable and extensible microbiome



- 612 data science using QIIME 2. *Nature Biotechnology* 37(8), 852–857.  
613 <https://doi.org/10.1038/s41587-019-0209-9>
- 614 Cerruti, M., Ouboter, H. T., Chasna, V., M van Loosdrecht, M. C., & Weissbrodt, D. G. (2020).  
615 Effects of light / dark diel cycles on the photoorganoheterotrophic metabolism of  
616 *Rhodopseudomonas palustris* for differential electron allocation to PHAs and H<sub>2</sub>. *bioRxiv*  
617 2020.08.19.258533. <https://doi.org/10.1101/2020.08.19.258533>
- 618 Cerruti, M., Stevens, B., Ebrahimi, S., Alloul, A., Vlaeminck, S. E., & Weissbrodt, D. G. (2020).  
619 Enriching and aggregating purple non-sulfur bacteria in an anaerobic sequencing-batch  
620 photobioreactor for nutrient capture from wastewater. *Frontiers in Bioengineering and*  
621 *Biotechnology*, 8, 1432. <https://doi.org/10.1101/2020.01.08.899062>
- 622 Conrad, R., & Schlegel, H. G. (1978). Regulation of Glucose, Fructose and Sucrose Catabolism in  
623 *Rhodopseudomonas capsulata*. *Journal of General Microbiology*, 105(2), 315–322.  
624 <https://doi.org/10.1099/00221287-105-2-315>
- 625 Converti, A., & Perego, P. (2002). Use of carbon and energy balances in the study of the anaerobic  
626 metabolism of *Enterobacter aerogenes* at variable starting glucose concentrations. *Applied*  
627 *Microbiology and Biotechnology*, 59(2–3), 303–309. [https://doi.org/10.1007/s00253-002-](https://doi.org/10.1007/s00253-002-1009-5)  
628 1009-5
- 629 Cowan, S. E., Gilbert, E., Liepmann, D., Keasling, J. D., Bioengineering Graduate Program, J., &  
630 Francisco, S. (2000). Commensal Interactions in a Dual-Species Biofilm Exposed to Mixed  
631 Organic Compounds. In *Applied and Environmental Microbiology* (Vol. 66, Issue 10).  
632 <http://aem.asm.org/>
- 633 D’Ercole, S., Spoto, G., Trentini, P., Tripodi, D., & Petrini, M. (2016). In vitro inactivation of  
634 *Enterococcus faecalis* with a led device. *Journal of Photochemistry and Photobiology B:*  
635 *Biology*, 160, 172–177. <https://doi.org/10.1016/j.jphotobiol.2016.04.015>
- 636 De Vos, P., Garrity, G., Jones, D., Krieg, N. R., Ludwig, W., Rainey, F. A., Schleifer, K.-H., &  
637 Whitman, W. B. (2005). The Firmicutes. In D. J. Brenner, N. R. Krieg, & J. T. Staley (Eds.),  
638 *Bergey’s Manual® of Systematic Bacteriology*. Springer US. [https://doi.org/10.1007/0-387-](https://doi.org/10.1007/0-387-29298-5)  
639 29298-5
- 640 de Vrije, G. J., & Claassen, P. A. M. (2003). Bio-methane & bio-hydrogen : status and perspectives  
641 of biological methane and hydrogen production (J. H. Reith & R. H. Wijffels (eds.)). *Dutch*  
642 *Biological Hydrogen Foundation*.
- 643 Föchlin, H. P., Schneider, C., & Egli, T. (2012). In glucose-limited continuous culture the  
644 minimum substrate concentration for growth, S<sub>min</sub>, is crucial in the competition between the  
645 enterobacterium *Escherichia coli* and *Chelatobacter heintzii*, an environmentally abundant  
646 bacterium. *The ISME Journal*, 6(4), 777–789. <https://doi.org/10.1038/ismej.2011.143>
- 647 Ghimire, A., Frunzo, L., Pirozzi, F., Trably, E., Escudie, R., Lens, P. N. L., & Esposito, G. (2015).  
648 A review on dark fermentative biohydrogen production from organic biomass: Process



- 649 parameters and use of by-products. *Applied Energy*, 144, 73–95.  
650 <https://doi.org/10.1016/j.apenergy.2015.01.045>
- 651 Ghosh, S., Dairkee, U. K., Chowdhury, R., & Bhattacharya, P. (2017). Hydrogen from food  
652 processing wastes via photofermentation using Purple Non-sulfur Bacteria (PNSB) – A  
653 review. *Energy Conversion and Management*, 141, 299-314.  
654 <https://doi.org/10.1016/j.enconman.2016.09.001>
- 655 Gill, C. O., & Suisted, J. R. (1978). The effects of temperature and growth rate on the proportion of  
656 unsaturated fatty acids in bacterial lipids. *Journal of General Microbiology*, 104(1), 31–36.  
657 <https://doi.org/10.1099/00221287-104-1-31>
- 658 Gomez-Flores, M., Nakhla, G., & Hafez, H. (2015). Microbial kinetics of *Clostridium termitidis* on  
659 cellobiose and glucose for biohydrogen production. *Biotechnology Letters*, 37(10), 1965–1971.  
660 <https://doi.org/10.1007/s10529-015-1891-4>
- 661 Grimmeler, C., Janssen, H., Krauße, D., Fischer, R. J., Bahl, H., Dürre, P., Liebl, W., & Ehrenreich,  
662 A. (2011). Genome-wide gene expression analysis of the switch between acidogenesis and  
663 solventogenesis in continuous cultures of *Clostridium acetobutylicum*. *Journal of Molecular*  
664 *Microbiology and Biotechnology*, 20(1), 1–15. <https://doi.org/10.1159/000320973>
- 665 Gwynne, P. J., & Gallagher, M. P. (2018). Light as a Broad-Spectrum Antimicrobial. *Frontiers in*  
666 *Microbiology*, 9, 119. <https://doi.org/10.3389/fmicb.2018.00119>
- 667 Hasona, A., Kim, Y., Healy, F. G., Ingram, L. O., & Shanmugam, K. T. (2004). Pyruvate Formate  
668 Lyase and Acetate Kinase Are Essential for Anaerobic Growth of *Escherichia coli* on Xylose.  
669 *Journal of Bacteriology*, 186(22), 7593–7600. [https://doi.org/10.1128/JB.186.22.7593-](https://doi.org/10.1128/JB.186.22.7593-7600.2004)  
670 [7600.2004](https://doi.org/10.1128/JB.186.22.7593-7600.2004)
- 671 Horiuchi, J. I., Shimizu, T., Tada, K., Kanno, T., & Kobayashi, M. (2002). Selective production of  
672 organic acids in anaerobic acid reactor by pH control. *Bioresource Technology*, 82(3), 209–  
673 213. [https://doi.org/10.1016/S0960-8524\(01\)00195-X](https://doi.org/10.1016/S0960-8524(01)00195-X)
- 674 Huang, L. I., Forsberg, C. W., & Gibbins, L. N. (1986). Influence of External pH and Fermentation  
675 Products on *Clostridium acetobutylicum* Intracellular pH and Cellular Distribution of  
676 Fermentation Products. *Applied and Environmental Microbiology*, 51(6), 1230-4.  
677 <https://doi.org/10.1128/aem.51.6.1230-1234.1986>
- 678 Hunter, C. N., Beatty, F. D., Thurnauer, M. C., & Thomas, J. (2009). The Purple Phototrophic  
679 Bacteria. Springer Netherlands. 1013 pp. <https://doi.org/10.1007/978-1-4020-8815-5>
- 680 Imam, S., Yilmaz, S., Sohmen, U., Gorzalski, A. S., Reed, J. L., Noguera, D. R., & Donohue, T. J.  
681 (2011). IRsp1095: A genome-scale reconstruction of the *Rhodobacter sphaeroides* metabolic  
682 network. *BMC Systems Biology*, 5(July). <https://doi.org/10.1186/1752-0509-5-116>
- 683 Inui, M., Momma, K., Matoba, R., Ikuta, M., Yamagata, H., & Yukawa, H. (1995).  
684 Characterization of alcohol-assimilating photosynthetic purple non-sulfur bacteria and cloning

- 685 of molecular chaperones from a purple non-sulfur bacterium. *Energy Conversion and*  
686 *Management*, 36(6–9), 767–770. [https://doi.org/10.1016/0196-8904\(95\)00117-V](https://doi.org/10.1016/0196-8904(95)00117-V)
- 687 Jang, J. W., Jung, H. M., Im, D. K., Jung, M. Y., & Oh, M. K. (2017). Pathway engineering of  
688 *Enterobacter aerogenes* to improve acetoin production by reducing by-products formation.  
689 *Enzyme and Microbial Technology*, 106, 114–118.  
690 <https://doi.org/10.1016/j.enzmictec.2017.07.009>
- 691 Johns, A. T. (1952). The Mechanism of Propionic Acid Formation by *Clostridium propionicum*.  
692 *Journal of General Microbiology*, 6(1–2), 123–127. [https://doi.org/10.1099/00221287-6-1-2-](https://doi.org/10.1099/00221287-6-1-2-123)  
693 123
- 694 Khanna, N., Kumar, K., Todi, S., & Das, D. (2012). Characteristics of cured and wild strains of  
695 *Enterobacter cloacae* IIT-BT 08 for the improvement of biohydrogen production.  
696 *International Journal of Hydrogen Energy*, 37(16), 11666–11676.  
697 <https://doi.org/10.1016/j.ijhydene.2012.05.051>
- 698 Kleerebezem, R., & van Loosdrecht, M. C. (2007). Mixed culture biotechnology for bioenergy  
699 production. *Current Opinion in Biotechnology*, 18(3), 207–212.  
700 <https://doi.org/10.1016/j.copbio.2007.05.001>
- 701 Kopf, S. H., & Newman, D. K. (2012). Photomixotrophic growth of *Rhodobacter capsulatus*  
702 SB1003 on ferrous iron. *Geobiology*, 10(3), 216–222. [https://doi.org/10.1111/j.1472-](https://doi.org/10.1111/j.1472-4669.2011.00313.x)  
703 4669.2011.00313.x
- 704 Kuenen, G. J. (2019). Continuous cultures (chemostats). In *Encyclopedia of Microbiology* (pp. 743–  
705 761). Elsevier. <https://doi.org/10.1016/B978-0-12-801238-3.02490-9>
- 706 Lamed, R. J., Lobos, J. H., & Su, T. M. (1988). Effects of Stirring and Hydrogen on Fermentation  
707 Products of *Clostridium thermocellum*. *Applied and Environmental Microbiology*, 54(5),  
708 1216–1221. <https://doi.org/10.1128/aem.54.5.1216-1221.1988>
- 709 Li, L., Li, K., Wang, Y., Chen, C., Xu, Y., Zhang, L., Han, B., Gao, C., Tao, F., Ma, C., & Xu, P.  
710 (2015). Metabolic engineering of *Enterobacter cloacae* for high-yield production of  
711 enantiopure (2R,3R)-2,3-butanediol from lignocellulose-derived sugars. *Metabolic*  
712 *Engineering*, 28, 19–27. <https://doi.org/10.1016/j.ymben.2014.11.010>
- 713 Madigan, M., Cox, J. C., & Gest, H. (1982). Photopigments in *Rhodospseudomonas capsulata* cells  
714 grown anaerobically in darkness. *Journal of Bacteriology*, 150(3), 1422–1429.  
715 <https://doi.org/10.1128/JB.150.3.1422-1429.1982>
- 716 Martens, D. E., Béal, C., Malakar, P., Zwietering, M. H., & Van't Riet, K. (1999). Modelling the  
717 interactions between *Lactobacillus curvatus* and *Enterobacter cloacae*: I. Individual growth  
718 kinetics. *International Journal of Food Microbiology*, 51(1), 53–65.  
719 [https://doi.org/10.1016/S0168-1605\(99\)00095-1](https://doi.org/10.1016/S0168-1605(99)00095-1)
- 720 NCBI. (n.d.). *Gene [Internet]*. Bethesda (MD): National Library of Medicine (US), National Center

- 721       for *Biotechnology Information*; 2004 – [cited 2021 05 13]. Available from:  
722       <https://www.ncbi.nlm.nih.gov/gene/No Title>.
- 723 Okubo, Y., Futamata, H., & Hiraishi, A. (2005). Distribution and Capacity for Utilization of Lower  
724 Fatty Acids of Phototrophic Purple Nonsulfur Bacteria in Wastewater Environments. *Microbes*  
725 *and Environments*, 20(3), 135–143. <https://doi.org/10.1264/jsme2.20.135>
- 726 Panikov, N. S. (2010). Microbial Ecology. In L. K. Wang, V. Ivanov, & J.-H. Tay (Eds.),  
727 *Environmental Biotechnology* (pp. 121–191). Humana Press. [https://doi.org/10.1007/978-1-60327-140-0\\_4](https://doi.org/10.1007/978-1-60327-140-0_4)
- 729 Pearman, P. B., Guisan, A., Broennimann, O., & Randin, C. F. (2008). Niche dynamics in space  
730 and time. *Trends in Ecology and Evolution*, 23(3), 149–158.  
731 <https://doi.org/10.1016/j.tree.2007.11.005>
- 732 Pechter, K. B., Gallagher, L., Pyles, H., Manoil, C. S., & Harwood, C. S. (2016). Essential genome  
733 of the metabolically versatile alphaproteobacterium *Rhodospseudomonas palustris*. *Journal of*  
734 *Bacteriology*, 198(5), 867–76. <https://doi.org/10.1128/JB.00771-15>
- 735 Pfennig, N. (1977). Phototrophic green and purple bacteria: a comparative, systematic survey.  
736 *Annual review of microbiology*, 31, 275–290.  
737 <https://doi.org/10.1146/annurev.mi.31.100177.001423>
- 738 Puyol, D., Barry, E. M., Hülsen, T., & Batstone, D. J. (2017). A mechanistic model for anaerobic  
739 phototrophs in domestic wastewater applications: Photo-anaerobic model (PANM). *Water*  
740 *Research*, 116, 241–253. <https://doi.org/10.1016/j.watres.2017.03.022>
- 741 Puyol, Daniel, & Batstone, D. J. (2017). Editorial: Resource Recovery from Wastewater by  
742 Biological Technologies. *Frontiers in Microbiology*, 8, 998.  
743 <https://doi.org/10.3389/fmicb.2017.00998>
- 744 Qin, C., Lei, Y., & Wu, J. (2018). Light/dark cycle enhancement and energy consumption of tubular  
745 microalgal photobioreactors with discrete double inclined ribs. *Bioresources and*  
746 *Bioprocessing*, 5(1). <https://doi.org/10.1186/s40643-018-0214-8>
- 747 Rai, P. K., & Singh, S. P. (2016). Integrated dark- and photo-fermentation: Recent advances and  
748 provisions for improvement. *International Journal of Hydrogen Energy*, 41(44), 19957–  
749 19971. <https://doi.org/10.1016/j.ijhydene.2016.08.084>
- 750 Rodríguez, J., Kleerebezem, R., Lema, J. M., & Van Loosdrecht, M. C. M. (2006). Modeling  
751 product formation in anaerobic mixed culture fermentations. *Biotechnology and*  
752 *Bioengineering*, 93(3), 592–606. <https://doi.org/10.1002/bit.20765>
- 753 Rombouts, Julius L, Mos, G., Weissbrodt, D. G., Kleerebezem, R., & Van Loosdrecht, M. C. M.  
754 (2019a). Diversity and metabolism of xylose and glucose fermenting microbial communities in  
755 sequencing batch or continuous culturing. *FEMS Microbiology Ecology*, 95(2), 233.  
756 <https://doi.org/10.1093/femsec/fiy233>

- 757 Rombouts, Julius L, Mos, G., Weissbrodt, D. G., Kleerebezem, R., & Van Loosdrecht, M. C. M.  
758 (2019b). The impact of mixtures of xylose and glucose on the microbial diversity and  
759 fermentative metabolism of sequencing-batch or continuous enrichment cultures. *FEMS*  
760 *Microbiology Ecology*, 95, 112. <https://doi.org/10.1093/femsec/fiz112>
- 761 Rombouts, Julius Laurens, Kranendonk, E. M. M., Regueira, A., Weissbrodt, D. G., Kleerebezem,  
762 R., & Loosdrecht, M. C. M. (2020). Selecting for lactic acid producing and utilising bacteria in  
763 anaerobic enrichment cultures. *Biotechnology and Bioengineering*, 117(5), 1281–1293.  
764 <https://doi.org/10.1002/bit.27301>
- 765 Sadaie, M., Nagano, T., Suzuki, T., Shinoyama, H., & Fujii, T. (1997). Some Properties and  
766 Physiological Roles of Phosphoenolpyruvate Carboxylase in *Rhodopseudomonas* sp. No. 7  
767 Grown on Ethanol under Anaerobic-light Conditions. *Bioscience, Biotechnology and*  
768 *Biochemistry*, 61(4), 625–630. <https://doi.org/10.1271/bbb.61.625>
- 769 Soto-Martin, E. C., Warnke, I., Farquharson, F. M., Christodoulou, M., Horgan, G., Derrien, M.,  
770 Faurie, J.-M., Flint, H. J., Duncan, S. H., & Louis, P. (2020). Vitamin Biosynthesis by Human  
771 Gut Butyrate-Producing Bacteria and Cross-Feeding in Synthetic Microbial Communities.  
772 *mBio*, 11(4), e00886-20. <https://doi.org/10.1128/mBio.00886-20>
- 773 Steindler, L., Rubin-Blum, M., Lavy, A., Deines, P., Hammerschmidt, K., & Bosch, T. C. G.  
774 (2020). Exploring the Niche Concept in a Simple Metaorganism. *Frontiers in Microbiology*,  
775 11, 1942. <https://doi.org/10.3389/fmicb.2020.01942>
- 776 Stomp, M., Huisman, J., Stal, L. J., & Matthijs, H. C. P. (2007). Colorful niches of phototrophic  
777 microorganisms shaped by vibrations of the water molecule. *The ISME Journal*, 1(4), 271–  
778 282. <https://doi.org/10.1038/ismej.2007.59>
- 779 Tanisho, S. (1998). Hydrogen Production by Facultative Anaerobe *Enterobacter aerogenes*. In O. R.  
780 Zaborsky, J. R. Benemann, T. Matsunaga, J. Miyake, & A. San Pietro (Eds.), *BioHydrogen*  
781 (pp. 273–279). Springer US. [https://doi.org/10.1007/978-0-585-35132-2\\_35](https://doi.org/10.1007/978-0-585-35132-2_35)
- 782 Temudo, M. F., Muyzer, G., Kleerebezem, R., & Van Loosdrecht, M. C. M. (2008). Diversity of  
783 microbial communities in open mixed culture fermentations: Impact of the pH and carbon  
784 source. *Applied Microbiology and Biotechnology*, 80(6), 1121–1130.  
785 <https://doi.org/10.1007/s00253-008-1669-x>
- 786 Thapa, L. P., Lee, S. J., Park, C., & Kim, S. W. (2019). Metabolic engineering of *Enterobacter*  
787 *aerogenes* to improve the production of 2,3-butanediol. *Biochemical Engineering Journal*,  
788 143, 169–178. <https://doi.org/10.1016/j.bej.2018.12.019>
- 789 Thapa, L. P., Lee, S. J., Yang, X., Lee, J. H., Choi, H. S., Park, C., & Kim, S. W. (2015). Improved  
790 bioethanol production from metabolic engineering of *Enterobacter aerogenes* ATCC 29007.  
791 *Process Biochemistry*, 50(12), 2051–2060. <https://doi.org/10.1016/j.procbio.2015.09.007>
- 792 Tsuji, A., Kaneko, Y., Takahashi, K., Ogawa, M., & Goto, S. (1982). The Effects of Temperature  
793 and pH on the Growth of Eight Enteric and Nine Glucose Non-Fermenting Species of Gram-

- 794 Negative Rods. *Microbiology and Immunology*, 26(1),15-24. <https://doi.org/10.1111/j.1348->  
795 0421.1982.tb00149.x
- 796 Valk, L. C., Frank, J., de la Torre-Cortés, P., van 't Hof, M., van Maris, A. J. A., Pronk, J. T., & van  
797 Loosdrecht, M. C. M. (2018). Galacturonate metabolism in anaerobic chemostat enrichment  
798 cultures: Combined fermentation and acetogenesis by the dominant sp. nov. “*Candidatus*  
799 Galacturonibacter soehngeni.” *Applied and Environmental Microbiology*, 84(18), e01370-18.  
800 <https://doi.org/10.1128/AEM.01370-18>
- 801 Venegas, D. P., De La Fuente, M. K., Landskron, G., González, M. J., Quera, R., Dijkstra, G.,  
802 Harmsen, H. J. M., Faber, K. N., & Hermoso, M. A. (2019). Short chain fatty acids (SCFAs)  
803 mediated gut epithelial and immune regulation and its relevance for inflammatory bowel  
804 diseases. *Frontiers in Immunology*, 10, 277. <https://doi.org/10.3389/fimmu.2019.00277>
- 805 Winkler, M.-K. H., Boets, P., Hahne, B., Goethals, P., & Volcke, E. I. P. (2017). Effect of the  
806 dilution rate on microbial competition: r-strategist can win over k-strategist at low substrate  
807 concentration. *PLOS One*, 12(3), e0172785. <https://doi.org/10.1371/journal.pone.0172785>
- 808 Yen, H. C., & Marrs, B. (1977). Growth of *Rhodopseudomonas capsulata* under anaerobic dark  
809 conditions with dimethyl sulfoxide. *Archives of Biochemistry and Biophysics*, 181(2), 411–  
810 418. [https://doi.org/10.1016/0003-9861\(77\)90246-6](https://doi.org/10.1016/0003-9861(77)90246-6)
- 811 Zagrodnik, R., & Laniecki, M. (2016). An unexpected negative influence of light intensity on  
812 hydrogen production by dark fermentative bacteria *Clostridium beijerinckii*. *Bioresource*  
813 *Technology*, 200, 1039–1043. <https://doi.org/10.1016/j.biortech.2015.10.049>
- 814 Zhi, R., Yang, A., Zhang, G., Zhu, Y., Meng, F., & Li, X. (2019). Effects of light-dark cycles on  
815 photosynthetic bacteria wastewater treatment and valuable substances production. *Bioresource*  
816 *Technology*, 274, 496–501. <https://doi.org/10.1016/j.biortech.2018.12.021>
- 817
- 818
